# Supplementary material for: Combining retinal and choroidal microvascular metrics improves discriminative power for diabetic retinopathy
Source: PubMed Central journal article supplement (PMC10359699; doi:10.1136/bjophthalmol-2021-319739), 2022-02-09

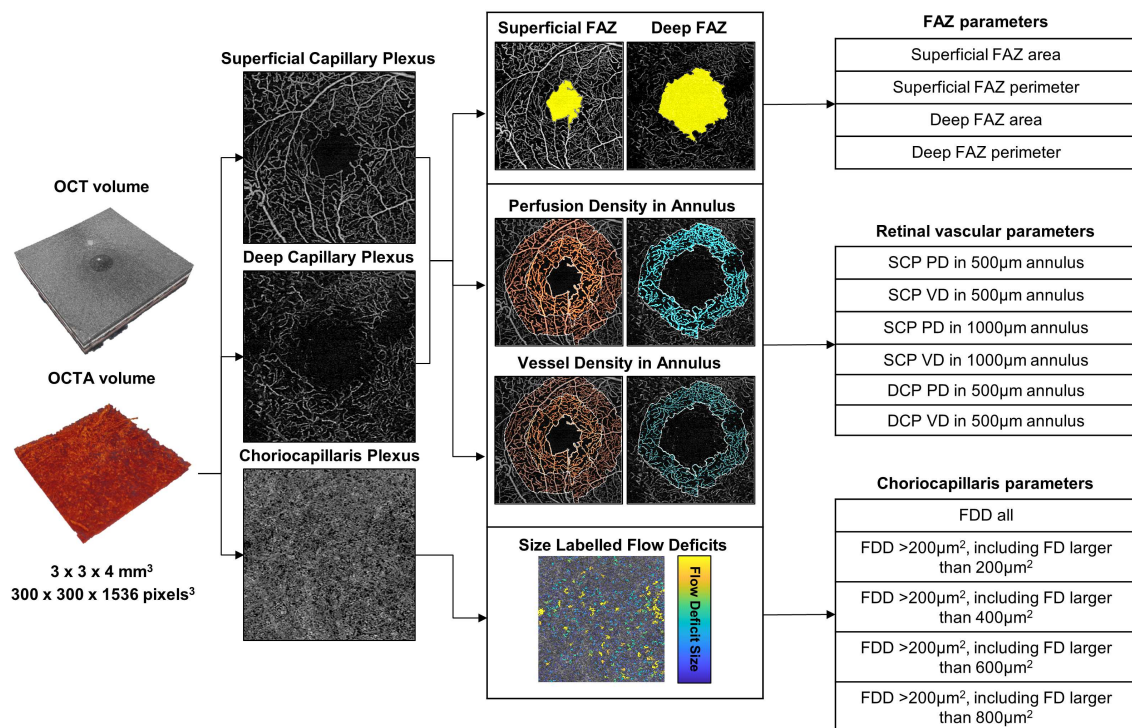

Supplement: bjophthalmol-2021-319739supp001.pdf [file bjophthalmol-2021-319739supp001.pdf]
