# Supplementary figures and images for: Combining retinal and choroidal microvascular metrics improves discriminative power for diabetic retinopathy
Source: HighWire-hosted journal article supplement (doi:10.1136/bjophthalmol-2021-319739), 2022-02-09

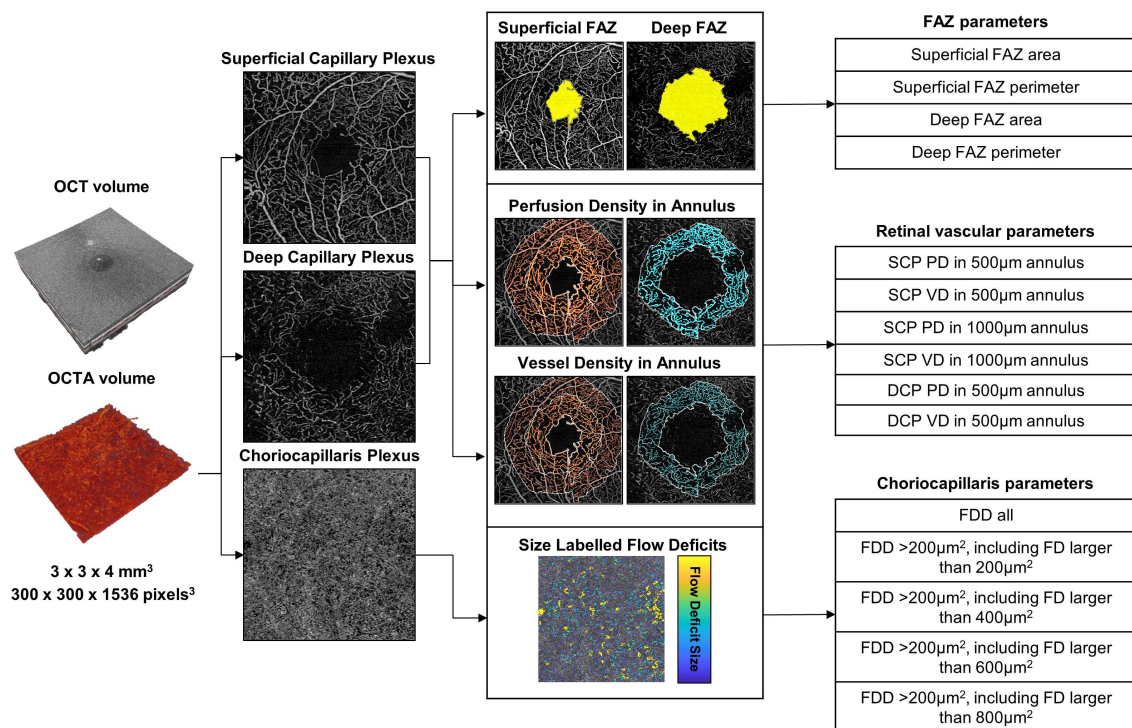

Supplement: bjophthalmol-2021-319739supp001_data_supplement.pdf [file bjophthalmol-2021-319739supp001_data_supplement.pdf]

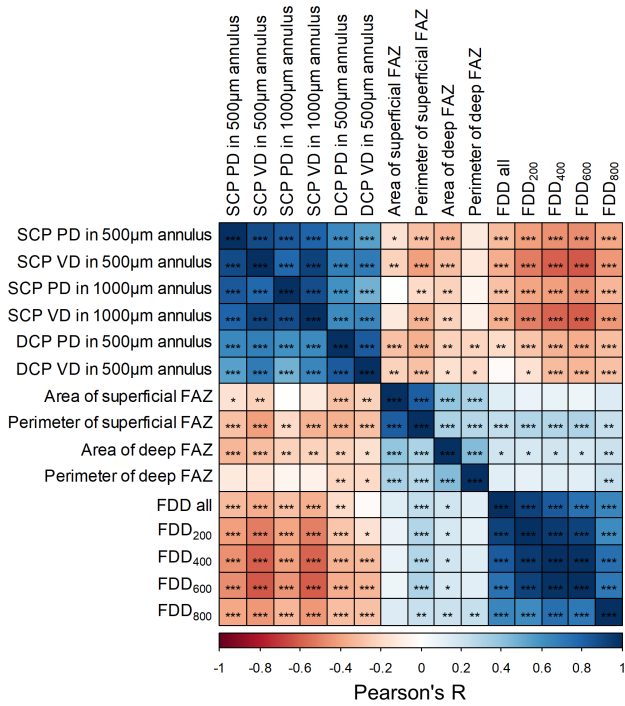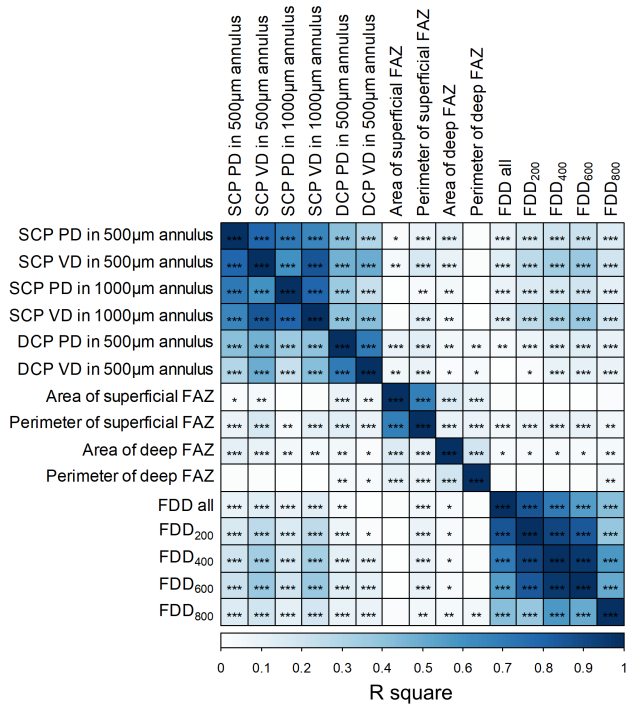

Supplement: bjophthalmol-2021-319739supp003_data_supplement.pdf [file bjophthalmol-2021-319739supp003_data_supplement.pdf]
